# Supplementary material
Source: PubMed Central journal article supplement (PMC4071551)
Supplement: rspb20140687supp1.pdf [file rspb20140687supp1.pdf]

1 Appendix 1. Comparisons of models for impacts of global change drivers on biota. Small  
 2 sample size of Akaike's information criterion (AICc), delta AICc and the model weight are  
 3 given for three trophic levels (producer, herbivore and parasitoid respectively) and two biotic  
 4 measures within those levels (density and process). Main effects, additive and interaction  
 5 models are fit to independent variables (rows) as AIC values for generalised linear mixed  
 6 effect models. The optimal model is presented in bold

7  
 8

|              | Trophic Level One |         |          |             | Trophic Level Two |          |         |             | Trophic Level Three |         |         |             |         |         |           |         |         |           |
|--------------|-------------------|---------|----------|-------------|-------------------|----------|---------|-------------|---------------------|---------|---------|-------------|---------|---------|-----------|---------|---------|-----------|
|              | AICc              | ΔAICc   | Weight   | Attack Rate | AICc              | ΔAICc    | Weight  | Attack Rate | AICc                | ΔAICc   | Weight  | Attack Rate |         |         |           |         |         |           |
| Area (A)     | 1404.399          | 35.1996 | 1.23E-08 | 8613.141    | 407.741           | 2.88E-89 | 1023.75 | 16.5019     | 2.36E-04            | -250.2  | 0       | 9.60E-01    | 1232.82 | 292.827 | 2.59E-64  | 366.611 | 24.7893 | 4.08E-06  |
| Edge (E)     | 1404.31           | 35.1099 | 1.28E-08 | 8507.809    | 302.409           | 2.15E-66 | 1021.88 | 14.6287     | 6.02E-04            | -243.34 | 6.89402 | 3.06E-02    | 1188.9  | 248.911 | 8.90E-55  | 370.281 | 28.4597 | 6.51E-07  |
| Location (L) | 1394.785          | 25.5853 | 1.50E-06 | 8616.288    | 410.888           | 5.98E-90 | 1027.79 | 20.5433     | 3.13E-05            | -238.54 | 11.6862 | 2.78E-03    | 1241.69 | 301.702 | 3.06E-66  | 356.572 | 14.7504 | 6.18E-04  |
| A + E        | 1404.12           | 34.9203 | 1.41E-08 | 8520.464    | 315.064           | 3.84E-69 | 1023.87 | 16.6264     | 2.22E-04            | -236.03 | 14.2004 | 7.92E-04    | 1189.43 | 249.439 | 6.84E-55  | 368.095 | 26.2731 | 1.94E-06  |
| A + L        | 1395.204          | 26.0041 | 1.22E-06 | 8610.937    | 405.537           | 8.69E-89 | 1029.68 | 22.433      | 1.22E-05            | -231.8  | 18.4265 | 9.57E-05    | 1238.29 | 298.305 | 1.67E-65  | 350.588 | 8.76617 | 1.23E-02  |
| E + L        | 1395.085          | 25.8855 | 1.29E-06 | 8506.251    | 300.851           | 4.69E-66 | 1027.84 | 20.5894     | 3.06E-05            | -225.57 | 24.6555 | 4.25E-06    | 1191.3  | 251.314 | 2.68E-55  | 358.563 | 16.7412 | 2.28E-04  |
| A * E        | 1404.167          | 34.9669 | 1.38E-08 | 8342.328    | 136.928           | 1.85E-30 | 1025.81 | 18.5645     | 8.41E-05            | -240.07 | 10.1602 | 5.97E-03    | 2322.46 | 1382.47 | 6.31E-301 | 366.395 | 24.5734 | 4.55E-06  |
| A * L        | 1398.651          | 29.4517 | 2.18E-07 | 8617.089    | 411.689           | 4.01E-90 | 1029.42 | 22.174      | 1.38E-05            | -210.59 | 39.6431 | 2.36E-09    | 1227.21 | 287.218 | 4.28E-63  | 357.462 | 15.6407 | 3.96E-04  |
| E * L        | 1369.526          | 0.32583 | 4.59E-01 | 8476.174    | 270.774           | 1.59E-59 | 1007.2  | 0           | 9.04E-01            | -174.07 | 76.1573 | 2.79E-17    | 1053.11 | 113.117 | 2.73E-25  | 356.538 | 14.7164 | 6.28E-04  |
| A + E + L    | 1394.992          | 25.7924 | 1.36E-06 | 8509.911    | 304.511           | 7.52E-67 | 1029.83 | 22.5774     | 1.13E-05            | -217.75 | 32.4774 | 8.51E-08    | 1192.09 | 252.098 | 1.81E-55  | 1192.09 | 850.265 | 2.30E-185 |
| A * E * L    | 1369.2            | 0       | 5.41E-01 | 8205.4      | 0                 | 1.00E+00 | 1011.75 | 4.50063     | 9.52E-02            | -93.23  | 157     | 7.76E-35    | 939.99  | 0       | 1.00E+00  | 341.82  | 0       | 9.86E-01  |
